RESEARCH ARTICLE

# Effects of starter nitrogen fertilizer on soybean root activity, leaf photosynthesis and grain yield

Zhijia Gai<sup>1,2</sup>, Jingtao Zhang<sup>2</sup>, Caifeng Li<sup>1\*</sup>

**1** Department of Agronomy, Northeast Agricultural University, Harbin, Heilongjiang, China, **2** Jiamusi Branch, Heilongjiang Academy of Agricultural Sciences, Jiamusi, Heilongjiang, China

\* [licaifeng@neau.edu.cn](mailto:licaifeng@neau.edu.cn)

## Abstract

The objective of this study was to examine the impact of starter nitrogen fertilizer on soybean root activity, leaf photosynthesis, grain yield and their relationship. To achieve this objective, field experiments were conducted in 2013 and 2014, using a randomized complete block design, with three replications. Nitrogen was applied at planting at rates of 0, 25, 50, and 75 kg N ha<sup>-1</sup>. In both years, starter nitrogen fertilizer benefited root activity, leaf photosynthesis, and consequently its yield. Statistically significant correlation was found among root activity, leaf photosynthetic rate, and grain yield at the developmental stage. The application of N<sub>25</sub>, N<sub>50</sub>, and N<sub>75</sub> increased grain yield by 1.28%, 2.47%, and 1.58% in 2013 and by 0.62%, 2.77%, and 2.06% in 2014 compared to the N<sub>0</sub> treatment. Maximum grain yield of 3238.91 kg ha<sup>-1</sup> in 2013 and 3086.87 kg ha<sup>-1</sup> in 2014 were recorded for N<sub>50</sub> treatment. Grain yield was greater for 2013 than 2014, possibly due to more favorable environmental conditions. This research indicated that applying nitrogen as starter is necessary to increase soybean yield in Sangjiang River Plain in China.

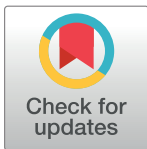

## OPEN ACCESS

**Citation:** Gai Z, Zhang J, Li C (2017) Effects of starter nitrogen fertilizer on soybean root activity, leaf photosynthesis and grain yield. PLoS ONE 12 (4): e0174841. <https://doi.org/10.1371/journal.pone.0174841>

**Editor:** Dafeng Hui, Tennessee State University, UNITED STATES

**Received:** November 28, 2016

**Accepted:** March 16, 2017

**Published:** April 7, 2017

**Copyright:** © 2017 Gai et al. This is an open access article distributed under the terms of the [Creative Commons Attribution License](https://creativecommons.org/licenses/by/4.0/), which permits unrestricted use, distribution, and reproduction in any medium, provided the original author and source are credited.

**Data Availability Statement:** All relevant data are within the paper.

**Funding:** This research was supported by National Key Technology Support Program. The grant number is 2014BAD11B01-A02.

**Competing interests:** The authors have declared that no competing interests exist.

## Introduction

There is speculation that supplied nitrogen from symbiotic N<sub>2</sub>-fixation is not always adequate to maximize soybean grain yield [1]. In the northeast of China, cool soil temperature at time of planting can limit soil microbial activity, and therefore potentially delay nitrogen fixation and possibly the vegetative growth in early stage. There are many factors influencing soybean nitrogen fixation and the response to applied nitrogen fertilizer. Sorensen et al. [2] reported that soil pH, temperature, and moisture affect soybean response to applied nitrogen fertilizer.

Nitrogen is one of the major nutrients that are required for soybean growth and development. Soybean plants obtain nitrogen from three sources [3], 1) nitrogen derived from biological N<sub>2</sub>-fixation by root nodule, 2) nitrogen requirement of soybean can be met by soil nitrogen [4]. High levels of soil nitrogen inhibit symbiotic N<sub>2</sub>-fixation, and under these conditions the soil supplies the majority of the plant's nitrogen needs [4]. Conversely, N<sub>2</sub>-fixation supplies the majority of the plant's nitrogen requirements under conditions of low soil nitrogen, and 3)

nitrogen from applied fertilizer. For optimum soybean yield, it is necessary to use both biological  $N_2$ -fixation and nitrogen uptake by soybean roots [5, 6]. Nitrogen fertilizer applied to soybean is based on the plant nitrogen needs during seedling development prior to nodule formation that is crucial to the growth and development of soybean [5, 7]. Hardy et al. [8] reported that  $N_2$ -fixation began 14 days after planting only when soybean was cultivated under optimum temperature and moisture conditions, thus a small amount of nitrogen fertilizer at planting might be beneficial to early vegetative growth. In the study by Bergersen [9], it was pointed out that nitrogen applied before sowing was beneficial to soybean growth, given that soybean root nodules were not formed until at least 9 days after soybean emergence. Additionally, starter nitrogen fertilizer can supply nitrogen until biological  $N_2$ -fixation begins by the root nodule [10].

Many researchers have extensively examined the effects of nitrogen fertilizer on soybean grain yield. Application of starter-N is directed at providing soybean with readily available soil nitrogen during seedling development, and has been shown to increase soybean grain yield [10]. However, nitrogen fertilizer at the time of planting may reduce  $N_2$ -fixation of soybean and its yield [11]. Results from previous researchers have been contradictory. Sij et al. [12], in Texas reported that starter nitrogen had no effect on soybean plant height, shoot fresh weight, leaf area, or grain yield. However, the research conducted by Starling et al. [13] for soybean following corn in southern Alabama indicated that grain yield and plant growth were higher when nitrogen fertilizer was applied as starter. Furthermore, their study suggested that early application of starter nitrogen fertilizer had significant effects on soybean grain yield. In addition to soybean grain yield, starter fertilizer-N increased plant height and biomass in the study by Starling et al. [13]. Jerrery et al. [14] pointed out that a large amount of fertilizer-N significantly increased soybean grain yield for irrigated and non-irrigated environments, and  $N_2$ -fixation may limit grain yield of soybean grown in both irrigated and non-irrigated environments of the midsouthern USA. Field experiments conducted by Boroomandan et al. [15] indicated that density of 45 plant  $m^{-2}$  and low level of nitrogen starter fertilizer (40 kg N  $ha^{-1}$ ) were optimum and increased soybean grain yield under conditions of their experiment. Research conducted in cool environments of the northern Great Plains indicated that low rates (<15 kg N  $ha^{-1}$ ) of starter fertilizer-N at planting increased soybean grain yield compared to no application of nitrogen fertilizer in 9 out of 11 years [16].

Researchers have determined the effects of nitrogen fertilizer on soybean grain yield, but results have been inconclusive. The effects of nitrogen fertilizer on soybean root nodules have been reported extensively. However, little information is available on the impacts of starter nitrogen fertilizer on leaf photosynthesis, root activity, and their relationship with grain yield. More specific information is needed on how nitrogen fertilizer influences soybean grain yield. Photosynthesis is a main pathway for plants to produce dry matter and it is estimated that 75 to 95% of crop dry weight is derived from photosynthesis [17]. Nitrogen derived from fertilizer in this study probably affect soybean root activity, leaf photosynthesis and consequently its yield. The objective of this investigation was to examine the relationship among root activity, photosynthetic parameters and soybean grain yield (not inoculated), with an emphasis on responses of root activity, leaf photosynthesis to starter nitrogen fertilizer rate in the 2-yr experiment in cool environments of Sangjiang River Plain of China.

## Materials and methods

A 2-year field study was conducted in 2013 and 2014 at Agricultural Experiment Station of Jiayin Branch of Heilongjiang Academy of Agricultural Sciences, China (46°18'N, 130°22'E). The research site is located in the north temperate zone and continental monsoon area (rainy

**Table 1. Monthly weather data for the 2013 and 2014 growing seasons.**

| Month     | 2013                     |                           | 2014                     |                           |
|-----------|--------------------------|---------------------------|--------------------------|---------------------------|
|           | Total precipitation (mm) | Mean air temperature (°C) | Total precipitation (mm) | Mean air temperature (°C) |
| May       | 55.1                     | 15.2                      | 129.0                    | 13.5                      |
| June      | 49.6                     | 21.0                      | 72.0                     | 21.4                      |
| July      | 220.4                    | 22.5                      | 72.4                     | 22.4                      |
| August    | 127.7                    | 21.2                      | 53.8                     | 21.1                      |
| September | 42.4                     | 14.5                      | 89.9                     | 14.7                      |

<https://doi.org/10.1371/journal.pone.0174841.t001>

and hot in summer, cold and arid in winter), has an average annual precipitation of 510 mm, and an average available accumulated temperature ( $\geq 10^{\circ}\text{C}$ ) is 2521°C. The site soil is the typical Mollisol (black soil) with silty clay loam texture. Table 1 lists the monthly weather data for the 2013 and 2014 growing seasons. Soil samples were collected to a depth of 20 cm at each site prior to planting. Table 2 lists the characteristics of the soil at the experimental site in 2013 and 2014.

The experiment was conducted as a randomized complete block (RCB) design with three replications. Urea (46-0-0) was the N source applied at rates of 0, 25, 50, and 75 kg N ha<sup>-1</sup> identified as N<sub>0</sub>, N<sub>25</sub>, N<sub>50</sub>, and N<sub>75</sub>, respectively. Phosphorus and potassium were applied at planting to each plot at 40 kg P ha<sup>-1</sup> as triple super-phosphate (0-36-0) and 20 kg K ha<sup>-1</sup> as KCl (0-0-60). All fertilizers were applied at planting in band (5 cm below and 5 cm to side of the seed row). Plots were 3.6 × 10 m with a 0.45-m row spacing (8 rows). The previous crop was corn.

Soybean cultivar Henong42 was planted at a rate of 450000 seeds ha<sup>-1</sup> by planter. Soybean was not inoculated before planting. Pendimethalin at 1.2 kg a.i. ha<sup>-1</sup> plus paraquat at 1.2 kg a.i. ha<sup>-1</sup> were applied to the entire experimental plots immediately after planting. Paraquat was applied to kill existing weeds at sowing. Pendimethalin was used to control early-season weeds. Haloxypop-P at 0.05 kg a.i. ha<sup>-1</sup> plus fomesafen at 0.25 kg a.i. ha<sup>-1</sup> were applied at 4–5 weeks after planting to all the experimental plots for postemergence weed control. Haloxypop-P was applied to kill gramineae weeds, and fomesafen was used to control broadleaf weed. Herbicides were applied with a tractor-mounted sprayer. Each plot was weeded by hand periodically throughout the season to keep weed-free. Soil sampling, crop planting, herbicide application, tillage, plant sampling, and harvest dates are reported in Table 3.

Samples were collected three times at V4 (completely unrolled leaf at the fourth node on the main stem), R2 (full bloom stage), and R4 (full pod stage) stages. Five consecutive plants were selected to determine the leaf area per plant, leaf dry weight per plant, leaf N yield, leaf area index (LAI), photosynthetic rate (Pn), and chlorophyll content (SPAD) of the middle leaflet of the third trifoliolate leaf.

Leaf area per plant was determined by using Portable Leaf Area Meter AM-300 (Bio-Scientific, Ltd., Great Am well, Herefordshire, England) and following equation was used to calculate leaf area index: LAI = Leaf area per plant (cm<sup>2</sup>)/Plant ground area (cm<sup>2</sup>). The fresh leaves per plant were oven-dried at 60°C, to a constant weight, and then dry leaf weight was determined. Specific leaf weight (SLW) was calculated as the ratio of leaf dry weight per plant to leaf

**Table 2. Characteristics of the topsoil (0–20 cm) before the experiment.**

|      | pH   | Organic matter (%) | Available N (mg kg <sup>-1</sup> ) | Available P (mg kg <sup>-1</sup> ) | Available K (mg kg <sup>-1</sup> ) |
|------|------|--------------------|------------------------------------|------------------------------------|------------------------------------|
| 2013 | 6.85 | 2.58               | 128.87                             | 36.62                              | 126.71                             |
| 2014 | 6.71 | 2.31               | 109.63                             | 38.46                              | 115.69                             |

<https://doi.org/10.1371/journal.pone.0174841.t002>

**Table 3. Planting, herbicide application, plant sampling, harvest, and soil sampling dates, 2013–2014.**

| Agronomic practice                   | 2013         | 2014         |
|--------------------------------------|--------------|--------------|
| Fall chisel *                        | 4 November   | 12 November  |
| soil sampling                        | 28 April     | 30 April     |
| seedbed preparation                  | 1 May        | 4 May        |
| planting                             | 5 May        | 7 May        |
| V4 biomass                           | 26 June      | 29 June      |
| R2 biomass                           | 16 July      | 18 July      |
| R4 biomass                           | 6 August     | 10 August    |
| Pre-emergence herbicide application  | 11 May       | 13 May       |
| Post-emergence herbicide application | 14 June      | 18 June      |
| Harvest                              | 21 September | 19 September |

\*performed the previous fall

<https://doi.org/10.1371/journal.pone.0174841.t003>

area per plant. Leaf samples were ground to pass through a 1-mm sieve. Total N yield in leaf was estimated by the Kjeldahl method of Liu et al. [18]. Photosynthetic rate of the middle leaflet of the third trifoliolate leaf was determined by using the CI-340 portable photosynthesis measuring system (CID, Inc., USA). Photosynthetic measurements were made on fully expanded leaves. Chlorophyll content (SPAD) of the middle leaflet of the third trifoliolate leaf was assessed using SPAD-502 Chlorophyll Meter Model (Konica Minolta Inc., Japan).

Root activity was determined by using the triphenyl tetrazolium chloride (TTC) method [19]. The triphenyl tetrazolium chloride is a chemical that is reduced by dehydrogenases mainly succinate dehydrogenase, when added to a tissue. The dehydrogenase activity is regarded as an index of soybean root activity. Root activity = amount of TTC reduction ( $\mu\text{g}$ )/fresh root weight (g)  $\times$  time (h). The roots per plant were carefully rinsed with tap water, and then oven-dried at 60°C, to a constant weight, and then the dry root weight was determined.

The yield components were pod number per plant, grain number per plant, grain number per pod, 100-grain weigh. Grain yield was determined by harvesting the plants in the two central rows from each plot. Harvested grains were weighed and adjusted to 130 g kg<sup>-1</sup> moisture.

All the data were statistically analyzed using Proc Mixed in SAS. Nitrogen effects were considered fixed and years were treated as random effects. Mean comparisons were made under Fisher's protected LSD Test at the 0.05 level of probability. Correlation analyses were also performed to evaluate the degree and significance of the correlation.

## Results and discussion

### Response of yield and yield components to starter nitrogen fertilizer

Grain yield and yield components under different nitrogen treatments were summarized in Table 4. Grain yield showed significant responses ( $P < 0.05$ ) to year and starter nitrogen fertilizer in 2014. The difference among N rates was significant, and N<sub>50</sub> produced the highest grain yield in 2014 (Table 4). Grain yield at N<sub>50</sub> was significantly higher than N<sub>0</sub>, and N<sub>25</sub> treatments, but yield difference between N<sub>50</sub> and N<sub>75</sub> was not significant in 2014. Yield increase with applying starter fertilizer-N to soybean in 2014 was due to lower available N in the soil (Table 2). However, significant response of grain yield to starter nitrogen fertilizer in 2013 was not detected (Table 4). Individual treatment effects showed that the application of N<sub>25</sub>, N<sub>50</sub>, and N<sub>75</sub> increased grain yield by 1.28%, 2.47%, and 1.58% in 2013 and by 0.62%, 2.77%, and 2.06% in 2014 over the control. Maximum grain yields of 3238.91 kg ha<sup>-1</sup> for 2014 growing

**Table 4. Effects of starter nitrogen fertilizer on soybean yield and yield components on two field locations in 2013 and 2014.**

| Nitrogen treatments | Grain yield (kg ha <sup>-1</sup> ) |           |         | Pod number per plant |        |       | Grain number per pod |      |      | Grain number per plant |         |       | 100-grain weight (g) |       |       |
|---------------------|------------------------------------|-----------|---------|----------------------|--------|-------|----------------------|------|------|------------------------|---------|-------|----------------------|-------|-------|
|                     | 2013                               | 2014      | Mean    | 2013                 | 2014   | Mean  | 2013                 | 2014 | Mean | 2013                   | 2014    | Mean  | 2013                 | 2014  | Mean  |
| N <sub>0</sub>      | 3160.98                            | 3003.60c  | 3082.29 | 21.33                | 19.27b | 20.30 | 2.67                 | 2.66 | 2.67 | 56.87                  | 51.13c  | 54.00 | 17.92                | 17.86 | 17.89 |
| N <sub>25</sub>     | 3201.37                            | 3022.31bc | 3111.84 | 21.33                | 20.13b | 20.73 | 2.68                 | 2.58 | 2.63 | 57.13                  | 51.87bc | 54.50 | 18.00                | 17.96 | 17.98 |
| N <sub>50</sub>     | 3238.91                            | 3086.87a  | 3162.89 | 21.53                | 21.60a | 21.57 | 2.70                 | 2.50 | 2.60 | 58.00                  | 53.67a  | 55.84 | 17.98                | 17.85 | 17.92 |
| N <sub>75</sub>     | 3210.85                            | 3065.56ab | 3138.21 | 21.20                | 19.80b | 20.50 | 2.72                 | 2.66 | 2.69 | 57.33                  | 52.73ab | 55.03 | 17.94                | 17.87 | 17.91 |
| ANOVA Effect        |                                    |           |         |                      |        |       |                      |      |      |                        |         |       |                      |       |       |
| Nitrogen (N)        | ns                                 | *         | ns      | ns                   | **     | ns    | ns                   | ns   | ns   | ns                     | *       | ns    | ns                   | ns    | ns    |
| Year (Y)            | ***                                |           |         | **                   |        |       | ns                   |      |      | ***                    |         |       | ns                   |       |       |
| N×Y                 | ns                                 |           |         | ns                   |        |       | ns                   |      |      | ns                     |         |       | ns                   |       |       |

Means with same letter are not significantly different (P<0.05) using LSD Test.

\*\*\*, \*\*, \*, and ns denote significance at 0.001, 0.01, 0.05 and not significant (P>0.05), respectively.

<https://doi.org/10.1371/journal.pone.0174841.t004>

season and 3086.87 kg ha<sup>-1</sup> in 2013 were recorded for N<sub>50</sub> treatment. However, significant yield difference between N<sub>50</sub> and N<sub>75</sub> was not found in both years. There was significant difference between years for grain yield (P<0.05). The lower grain yield for 2014 growing season, compared with 2013 could be attributed to differences in precipitation throughout the growing season (Table 1). It has been shown that adequate rainfall was critical to optimal soybean grain yield [20, 21]. Serraj et al. [22] found that dry weather during the soybean growth season caused negative effects on soybean grain yield.

Soybean grain yield is directly influenced by many environmental factors. Among these, nitrogen fertilization can affect soybean grain yield [23]. Nitrogen is one of the most important nutrients affecting soybean grain yield [24–26]. Muchow et al. [27] reported that nitrogen input was a “major constraint” to high soybean yield based on analysis of crop stimulation. Maximum grain yield was obtained at intermediate level of nitrogen application each year in our study. Results from this study proved that excessive or insufficient nitrogen fertilizer was not beneficial to an increase in grain yield of soybean, and intermediate level of starter nitrogen fertilization (N<sub>50</sub>) increased grain yield. Similarly, an increase in grain yield of soybean has been observed in response to N application [28]. Our results are in agreement with the work of Tian [28], who pointed out that soybean grain yield at 1.06 g N pot<sup>-1</sup> was significantly higher than that at 0 g N pot<sup>-1</sup> and 1.59 g N pot<sup>-1</sup> in the pot experiment. Based on their research, high level of nitrogen application reduced grain yield due to impeding the growth of soybean root and root nodule. However, Maw et al. [29] reported that four rates of N fertilizer (0, 25, 50, and 75 kg N ha<sup>-1</sup>) were applied as starter nitrogen and the highest grain yield in both seasons was observed at N<sub>75</sub>. A study conducted in Texas showed that nitrogen fertilizer applied at the time of planting had no significant effect on soybean leaf area or grain yield [12]. Some researchers believe that a small amount of starter fertilizer-N placed near the seed can cause a positive effect on early growth and soybean grain yield, particularly in situations where soil fertility is low or unfavorable environmental conditions exist [12]. Unfavorable conditions, such as cool climates, can lead to excessively cool soil temperature thus delaying biological N<sub>2</sub>-fixation [8].

There were significant differences between two years for pod number per plant and grain number per plant (P<0.05). Similar to the effect of starter nitrogen on grain yield in 2014, pod number per plant and grain number per plant showed significant response to starter nitrogen fertilizer for 2014 growing season (Table 4). Individual treatment effects illustrated that the

application of N<sub>25</sub>, N<sub>50</sub>, and N<sub>75</sub> increased pod number per plant by 4.46%, 12.09%, and 2.75% over the control in 2014, respectively. Our results showed that grain per plant at N<sub>25</sub>, N<sub>50</sub>, and N<sub>75</sub> was 1.45%, 4.97%, and 3.13% higher compared to N<sub>0</sub> in 2014. However, grain number per pod and 100-grain weight were not significantly affected by N fertilizer application each year and across years (P>0.05). Significant nitrogen by year interaction was not observed for yield components. Our results are in agreement with Sorensen et al. [2], Jeffery et al. [14], and Purell et al. [30], who found that the majority of soybean grain yield increase resulting from high rates of applied nitrogen fertilizer to soybean before planting is attributable to an increase in grain number. Pod number per plant was the yield component easily affected by change in environmental and cultural conditions [29, 31, 32]. In our experiment, starter nitrogen fertilizer had significant impacts on pod number per plant in 2014, while starter nitrogen exerted no significant effect on grain number per pod in 2014. Therefore, the increase in grain number per plant from starter nitrogen could be attributable to pod number per plant rather than grain number per pod (Table 4). Herbert [33] reported that grain number per pod was a minor component determining soybean grain yield. The small change of grain number per pod and 100-grain weight under different treatments indicated that grain number per pod and 100-grain weight were strongly determined by the internal genetic mechanism, and were less influenced by starter nitrogen fertilizer in our research. Similar to our results, Di et al. [34] pointed out that nitrogen had no significant influence on 100-grain weight. Jeffery et al. [14] reported that fertilizer N applied shortly after planting had little effect on grain weight in either the non-irrigated or irrigated environment. However, positive effect of nitrogen fertilizer on 100-grain weight was reported by several researchers [35–38].

### Response of dry root weight and root activity to starter nitrogen fertilizer

As shown in Tables 5 and 6, treatments significantly influenced dry root weight and root activity (P<0.05) at V4, and R2 stages each year and across years. Intermediate level of nitrogen fertilizer (N<sub>50</sub>) produced highest dry root weight and root activity, and thus highest grain yield in our study. Our results were in agreement with the work of Liu et al. [18], who found that high level of nitrogen fertilizer inhibited the growth and development of soybean root in the pot experiment. Wang et al. [39] also pointed out that a certain amount of nitrogen fertilizer benefited the increase of root weight. Our findings supported Zhang et al. [40], who reported that high nitrogen level inhibited the dry root weight and root activity at V5, R1, and R3 stages. Seasonal air temperature and precipitation patterns differed between 2013 and 2014 (Table 1). Therefore, there was significant difference between years for dry root weight and root activity.

**Table 5. Effects of nitrogen treatments on dry root weight at different stages (g plant<sup>-1</sup>).**

| Nitrogen treatments | V4    |       |       | R2    |       |       | R4   |       |       |
|---------------------|-------|-------|-------|-------|-------|-------|------|-------|-------|
|                     | 2013  | 2014  | Mean  | 2013  | 2014  | Mean  | 2013 | 2014  | Mean  |
| N <sub>0</sub>      | 0.26c | 0.29c | 0.28d | 1.38d | 1.63c | 1.51d | 3.01 | 3.05c | 3.03c |
| N <sub>25</sub>     | 0.36a | 0.36b | 0.36b | 1.87b | 1.88b | 1.88b | 3.11 | 3.25b | 3.18b |
| N <sub>50</sub>     | 0.38a | 0.45a | 0.42a | 1.96a | 2.08a | 2.02a | 3.18 | 3.37a | 3.28a |
| N <sub>75</sub>     | 0.31b | 0.33b | 0.32c | 1.51c | 1.83b | 1.67c | 3.07 | 3.17b | 3.12b |
| ANOVA Effect        |       |       |       |       |       |       |      |       |       |
| Nitrogen (N)        | **    | **    | ***   | *     | **    | **    | ns   | *     | **    |
| Year (Y)            |       | **    |       |       | **    |       |      | **    |       |
| N×Y                 |       | *     |       |       | *     |       |      | ns    |       |

Means with same letter are not significantly different (P<0.05) using LSD Test.

\*\*\*, \*\*, \*, and ns denote significance at 0.001, 0.01, 0.05 and not significant (P>0.05), respectively.

<https://doi.org/10.1371/journal.pone.0174841.t005>

**Table 6. Effects of nitrogen treatments on root activity at different stages (TTC reduction  $\mu\text{g g}^{-1} \text{h}^{-1}$ ).**

| Nitrogen treatments | V4    |       |       | R2      |        |        | R4    |         |        |
|---------------------|-------|-------|-------|---------|--------|--------|-------|---------|--------|
|                     | 2013  | 2014  | Mean  | 2013    | 2014   | Mean   | 2013  | 2014    | Mean   |
| N <sub>0</sub>      | 78.3c | 72.5d | 75.4d | 129.8c  | 123.3c | 126.6d | 105.4 | 99.2c   | 102.3b |
| N <sub>25</sub>     | 80.3c | 79.6c | 80.0c | 131.7bc | 127.8c | 129.8c | 110.0 | 102.3bc | 106.2b |
| N <sub>50</sub>     | 96.6a | 94.1a | 95.4a | 148.4a  | 143.1a | 145.8a | 125.5 | 113.2a  | 119.4a |
| N <sub>75</sub>     | 83.8b | 84.2b | 84.0b | 134.5b  | 133.2b | 133.9b | 111.4 | 108.4ab | 109.9b |
| ANOVA Effect        |       |       |       |         |        |        |       |         |        |
| Nitrogen (N)        | **    | ***   | ***   | **      | ***    | **     | ns    | *       | **     |
| Year (Y)            | **    |       |       | **      |        |        | *     |         |        |
| N×Y                 | *     |       |       | ns      |        |        | ns    |         |        |

Means with same letter are not significantly different ( $P < 0.05$ ) using LSD Test.

\*\*\*, \*\*, \*, and ns denote significance at 0.001, 0.01, 0.05 and not significant ( $P > 0.05$ ), respectively.

<https://doi.org/10.1371/journal.pone.0174841.t006>

### Response of leaf nitrogen yield to starter nitrogen fertilizer

As shown in Table 7, the leaf nitrogen yield varied significantly among treatments at V4, and R2 stages each year and across years. However, significant response of leaf N yield to starter nitrogen fertilizer was not seen at R4 stage in both years. The nitrogen yield in leaf increased with increasing nitrogen rates up to N<sub>50</sub>, and then decreased with applying higher rates of nitrogen fertilizer at the developmental stage. Nitrogen fertilizer at planting was beneficial to the increase in leaf nitrogen yield in our study. In terms of nutrient acquisition, the roots have long been recognized as being important in determining the capacity for plants to access and mediate the availability of essential nutrients in soil [41]. Our results were similar to the work of Osborne et al. [42] reported that starter nitrogen fertilizer had a positive impact on early plant nitrogen concentration at the early growth stage. High level of nitrogen fertilizer inhibited the root growth and root activity (Tables 5 and 6), and thus decreased the uptake and assimilation of nitrogen at the developmental stage in our study. Our results are in agreement with the previous experiment conducted by Wang et al. [39] pointed out that a certain amount of nitrogen fertilizer was beneficial to the soybean root growth and thus increased nitrogen uptake, especially in the soil with low available nitrogen.

**Table 7. Effects of starter nitrogen fertilizer on N yield in leaf at different stages ( $\text{g m}^{-2}$ ).**

| Nitrogen treatments | V4     |        |        | R2     |        |        | R4    |       |       |
|---------------------|--------|--------|--------|--------|--------|--------|-------|-------|-------|
|                     | 2013   | 2014   | Mean   | 2013   | 2014   | Mean   | 2013  | 2014  | Mean  |
| N <sub>0</sub>      | 0.693c | 0.701b | 0.697c | 1.613c | 1.570d | 1.592d | 3.346 | 3.262 | 3.304 |
| N <sub>25</sub>     | 0.831b | 0.758b | 0.795b | 1.697c | 1.774c | 1.736c | 3.377 | 3.322 | 3.35  |
| N <sub>50</sub>     | 0.930a | 0.947a | 0.939a | 2.239a | 2.337a | 2.288a | 3.366 | 3.212 | 3.289 |
| N <sub>75</sub>     | 0.955a | 0.899a | 0.927a | 1.931b | 1.988b | 1.960b | 3.397 | 3.332 | 3.365 |
| ANOVA Effect        |        |        |        |        |        |        |       |       |       |
| Nitrogen (N)        | ***    | **     | ***    | ***    | ***    | ***    | ns    | ns    | ns    |
| Year (Y)            | ns     |        |        | ns     |        |        | ns    |       |       |
| N×Y                 | ns     |        |        | ns     |        |        | ns    |       |       |

Means with same letter are not significantly different ( $P < 0.05$ ) using LSD Test.

\*\*\*, \*\*, and ns denote significance at 0.001, 0.01 and not significant ( $P > 0.05$ ), respectively.

<https://doi.org/10.1371/journal.pone.0174841.t007>

**Table 8. Effects of starter nitrogen fertilizer on leaf chlorophyll content at different stages.**

| Nitrogen treatments | V4     |        |        | R2     |        |        | R4    |       |       |
|---------------------|--------|--------|--------|--------|--------|--------|-------|-------|-------|
|                     | 2013   | 2014   | Mean   | 2013   | 2014   | Mean   | 2013  | 2014  | Mean  |
| N <sub>0</sub>      | 40.52d | 39.63b | 40.08d | 45.76b | 44.36b | 45.06b | 40.62 | 39.90 | 40.26 |
| N <sub>25</sub>     | 45.73b | 41.21a | 43.47b | 48.98a | 46.89b | 47.94a | 40.86 | 40.20 | 40.53 |
| N <sub>50</sub>     | 47.19a | 41.84a | 44.52a | 48.25a | 49.98a | 49.12a | 40.72 | 40.71 | 40.72 |
| N <sub>75</sub>     | 42.60c | 41.39a | 42.00c | 47.89b | 50.14a | 49.02a | 40.55 | 40.64 | 40.60 |
| ANOVA Effect        |        |        |        |        |        |        |       |       |       |
| Nitrogen (N)        | ***    | *      | ***    | **     | **     | ***    | ns    | ns    | ns    |
| Year (Y)            |        | ***    |        |        | *      |        |       | ***   |       |
| N×Y                 |        | ***    |        |        | **     |        |       | ns    |       |

Means with same letter are not significantly different (P<0.05) using LSD Test.

\*\*\*, \*\*, \*, and ns denote significance at 0.001, 0.01, 0.05 and not significant (P>0.05), respectively.

<https://doi.org/10.1371/journal.pone.0174841.t008>

### Response of chlorophyll content to starter nitrogen fertilizer

The data in Table 8 show that the chlorophyll content, in general, was positively affected by starter nitrogen fertilizer in 2013 and 2014. Starter nitrogen fertilizer significantly increased the chlorophyll content (SPAD value) at early stage (V4, and R2). The difference between years was significant. Similar to the early findings of Shen et al. [43], who reported that nitrogen applied at planting was beneficial to the increase in the chlorophyll content. High level of nitrogen fertilizer (N<sub>75</sub>) significantly decreased the chlorophyll content compared to intermediate level of nitrogen fertilizer (N<sub>50</sub>) at V4, and R2 stages in 2013. However, the difference in the chlorophyll content between N<sub>75</sub> and N<sub>50</sub> was not significant in 2014. That was probably because the available N of soil in 2013 was higher compared with 2014. High nitrogen level (N<sub>75</sub>) provided excessive nitrogen to the soil in 2014 (Table 2), inhibiting the root activity and dry root weight (Tables 5 and 6). Therefore, our results indicated that a heavy supply of fertilizer N applied to the soil with high available nitrogen could cause a decrease in the chlorophyll content.

### Response of leaf photosynthetic rate to starter nitrogen fertilizer

The data in Table 9 indicated that there was significant difference between years for photosynthetic rate (P<0.01). Significant effect of nitrogen fertilizer on photosynthetic rate was detected at V4, and R2 stages each year, and starter nitrogen fertilizer had significant effect on

**Table 9. Effects of starter nitrogen fertilizer on leaf photosynthetic rate at different stages (μmol CO<sub>2</sub> m<sup>-2</sup> s<sup>-1</sup>).**

| Nitrogen treatments | V4      |        |        | R2     |        |        | R4    |         |       |
|---------------------|---------|--------|--------|--------|--------|--------|-------|---------|-------|
|                     | 2013    | 2014   | Mean   | 2013   | 2014   | Mean   | 2013  | 2014    | Mean  |
| N <sub>0</sub>      | 18.79bc | 15.78b | 15.90b | 24.87a | 22.20c | 23.54b | 20.23 | 17.35c  | 18.79 |
| N <sub>25</sub>     | 19.91ab | 16.84b | 17.98b | 25.06a | 22.11c | 23.59b | 20.54 | 17.53bc | 19.04 |
| N <sub>50</sub>     | 21.13a  | 19.07a | 19.29a | 25.91a | 26.24a | 26.08a | 20.51 | 18.11a  | 19.31 |
| N <sub>75</sub>     | 17.93c  | 18.14a | 16.35b | 22.54b | 24.27b | 23.41b | 20.06 | 17.84ab | 18.95 |
| ANOVA Effect        |         |        |        |        |        |        |       |         |       |
| Nitrogen (N)        | *       | *      | ***    | **     | **     | ***    | ns    | *       | ns    |
| Year (Y)            |         | ***    |        |        | **     |        |       | ***     |       |
| N×Y                 |         | *      |        |        | ***    |        |       | ns      |       |

Means with same letter are not significantly different (P<0.05) using LSD Test.

\*\*\*, \*\*, \*, and ns denote significance at 0.001, 0.01, 0.05 and not significant (P>0.05), respectively.

<https://doi.org/10.1371/journal.pone.0174841.t009>



photosynthetic rate at R4 stage in 2014. However, significant response of photosynthetic rate to fertilizer N was not found at R4 stage in 2013. That was largely due to the growing season environment at R4 stage. The photosynthetic rate is an important parameter of photosynthesis and enhancing photosynthetic rate is an important way to increase soybean grain yield [44]. Chlorophyll is vital for photosynthesis, which allows soybean to absorb energy from light [25, 45]. Our results showed that starter nitrogen fertilizer had positive effect on the chlorophyll content, and thus promoted the increase of photosynthetic rate at the developmental stage. Results from Zhang et al. [46] indicated that fertilizer N increased the chlorophyll content and photosynthetic rate of soybean in the pot experiment. Anten [47] reported that the improvement of photosynthetic characteristics has a significant impact on crop yield, growth and development. In our study, N<sub>50</sub> produced highest grain yield, which could be ascribed to highest leaf photosynthetic rate at the developmental stages.

### Response of specific leaf weight to starter nitrogen fertilizer

The effect of N fertilization on specific leaf weight was shown in Table 10. Specific leaf weight, the ratio of leaf dry matter to leaf area, is an important parameter of evaluating photosynthetic capacity and is regarded as an important indicator for soybean variety selection by breeding researchers [48]. There was significant difference between the two years for specific leaf weight at the developmental stage (P<0.05), indicating that the specific leaf weight in soybean was easily affected by environmental conditions. Starter nitrogen fertilizer statistically increased specific leaf weight at early stage (V4, and R2), but had no significant impact on specific leaf weight at R4 stage in 2013. However, significant response of specific leaf weight to nitrogen, applied and incorporated at planting was observed at V4, R2, and R4 stages in 2014 (P<0.05). Enhancing specific leaf weight may improve leaf photosynthesis in soybean [49]. Thompson et al. [50] observed that increasing appropriate photosynthetic rate per leaf area may improve grain yield in soybean. Selection for high specific leaf weight in soybean may increase photosynthetic rate [50], which in turn may improve grain yield. To maximize total photosynthetic performance, and perhaps the grain yield, of a soybean cultivar, it would be necessary to maintain high specific leaf weight. Results obtain from our study showed that starter nitrogen fertilizer promoted specific leaf weight, and subsequently had positive effect on grain yield.

### Response of leaf area index to starter nitrogen fertilizer

Results from this study showed that starter nitrogen fertilizer had much significant effect on leaf area index at V4, and R2 stages (Table 11). Leaf area index was significantly affected at R4

**Table 10. Effects of nitrogen treatments on specific leaf weight at different stages (g m<sup>-2</sup>).**

| Nitrogen treatments | V4     |         |         | R2     |         |         | R4    |         |         |
|---------------------|--------|---------|---------|--------|---------|---------|-------|---------|---------|
|                     | 2013   | 2014    | Mean    | 2013   | 2014    | Mean    | 2013  | 2014    | Mean    |
| N <sub>0</sub>      | 48.03b | 38.06c  | 43.05b  | 49.56b | 45.06b  | 47.31c  | 53.68 | 50.67c  | 52.18b  |
| N <sub>25</sub>     | 50.31a | 39.54bc | 44.93ab | 50.38b | 47.13ab | 48.76b  | 54.84 | 52.08bc | 53.46a  |
| N <sub>50</sub>     | 49.59a | 45.78a  | 47.69a  | 52.12a | 48.81a  | 50.47a  | 55.19 | 54.10a  | 54.65a  |
| N <sub>75</sub>     | 44.27c | 43.21ab | 43.74b  | 49.28b | 47.09ab | 48.19bc | 54.04 | 53.02ab | 53.53ab |
| ANOVA Effect        |        |         |         |        |         |         |       |         |         |
| Nitrogen (N)        | *      | **      | *       | *      | *       | **      | ns    | **      | *       |
| Year (Y)            |        | ***     |         |        | ***     |         |       | ***     |         |
| N×Y                 |        | **      |         |        | Ns      |         |       | ns      |         |

Means with same letter are not significantly different (P<0.05) using LSD Test.

\*\*\*, \*\*, \*, and ns denote significance at 0.001, 0.01, 0.05 and not significant (P>0.05), respectively.

<https://doi.org/10.1371/journal.pone.0174841.t010>

**Table 11. Effects of starter nitrogen fertilizer on leaf area index at different stages.**

| Nitrogen treatments | V4    |        |       | R2     |        |       | R4   |       |        |
|---------------------|-------|--------|-------|--------|--------|-------|------|-------|--------|
|                     | 2013  | 2014   | Mean  | 2013   | 2014   | Mean  | 2013 | 2014  | Mean   |
| N <sub>0</sub>      | 1.19d | 1.13c  | 1.21d | 5.59c  | 5.10c  | 5.35c | 5.04 | 4.87b | 4.96b  |
| N <sub>25</sub>     | 1.28c | 1.31b  | 1.30c | 5.86b  | 5.31bc | 5.59b | 5.03 | 4.98a | 5.01ab |
| N <sub>50</sub>     | 1.53a | 1.42a  | 1.48a | 5.99a  | 5.89a  | 5.94a | 5.16 | 5.04a | 5.10a  |
| N <sub>75</sub>     | 1.39b | 1.38ab | 1.39b | 5.91ab | 5.56ab | 5.74b | 5.10 | 5.01a | 5.06a  |
| ANOVA Effect        |       |        |       |        |        |       |      |       |        |
| Nitrogen (N)        | ***   | **     | ***   | ***    | **     | ***   | ns   | **    | *      |
| Year (Y)            | ns    |        |       | ***    |        |       | **   |       |        |
| N×Y                 | *     |        |       | ns     |        |       | ns   |       |        |

Means with same letter are not significantly different ( $P < 0.05$ ) using LSD Test.

\*\*\*, \*\*, \*, and ns denote significance at 0.001, 0.01, 0.05 and not significant ( $P > 0.05$ ), respectively.

<https://doi.org/10.1371/journal.pone.0174841.t011>

stage in 2014 and did not show significant response to starter nitrogen fertilizer at R4 stage in 2013. That may be due to difference growing environmental conditions. Plant growth like LAI was positively correlated with grain yield [51, 52]. Starter nitrogen fertilizer increased soybean leaf area index and therefore had subsequent effect on grain yield in 2014 (Tables 11 and 4). Our results corroborate the previous studies which reported that a small amount of starter N at planting could be beneficial to early growth [8, 42]. In our study, N<sub>50</sub> produced highest leaf area index at the developmental stages. High level of nitrogen treatment (N<sub>75</sub>) decreased the leaf area index. That is because N<sub>75</sub> inhibited the root activity and decreased the dry root weight (Tables 5 and 6) compared to N<sub>50</sub>, and thus reduced the leaf area index.

### Correlation analysis among traits

The correlation among traits was shown in Table 12. There was positively significant relationship between root activity and grain yield at V4, R2, and R4 stages with a correlation coefficient of 0.4852\*, 0.5862\*\*, and 0.5953\*\*, respectively, indicating that an increase in root activity can help to enhance the grain yield. This finding was in agreement with the work of Zhang et al. [46]. However, significantly positive relationship was not found between dry root weight and grain yield. Moreover, there was positive relationship between root activity and leaf nitrogen yield at V4, R2, and R4 stages, with a correlation coefficient of 0.7621\*\*, 0.8792\*\*, and 0.4134\*, respectively. This revealed that increasing root activity benefited the uptake of nitrogen.

Positive correlation between chlorophyll content and photosynthetic rate was observed in our study. Our findings supported some researchers who reported positive relationship between chlorophyll content and photosynthetic rate [46, 53]. As shown in Table 4, nitrogen fertilizer applied at planting enhanced soybean grain yield. It may be attributed to the increase in the chlorophyll content and photosynthetic rate of soybean leaf. Positive relationship between chlorophyll content and grain yield was observed at V4, R2, and R4 stages with a correlation coefficient of 0.4261\*, 0.4153\*, and 0.4447\*, respectively. A significant and positive relationship between chlorophyll content and grain yield was recorded by Zhang et al. [54]. The relationship between leaf N yield and grain yield was positive, but not significant. Therefore, we assume that the SPAD value (chlorophyll content) could provide a better and faster estimate of potential grain yield than leaf N yield at the early growth stage.

Our results showed a significant and positive relationship between photosynthetic rate and soybean grain yield at V4, R2, and R4 stages, with a correlation coefficient of 0.4281\*, 0.7514\*\*,

**Table 12. Correlation coefficients among grain yield, root activity, dry root weight, leaf area index, specific leaf weight, photosynthetic rate, chlorophyll content and leaf N yield.**

| Developmental stage | Parameter            | Dry root weight | Root activity | Photosynthetic rate | Leaf area index | Leaf N yield | Chlorophyll content | Specific leaf weight |
|---------------------|----------------------|-----------------|---------------|---------------------|-----------------|--------------|---------------------|----------------------|
| V4                  | Grain yield          | 0.0898          | 0.4852*       | 0.4281*             | 0.3957          | 0.4317*      | 0.4261*             | 0.4028*              |
|                     | Specific leaf weight | 0.4051*         | 0.3774        | 0.7429**            | 0.1267          | 0.2359       | 0.6734**            |                      |
|                     | Chlorophyll content  | 0.534**         | 0.5877**      | 0.8558**            | 0.4032          | 0.437*       |                     |                      |
|                     | Leaf N yield         | 0.5793**        | 0.7621**      | 0.3914              | 0.7763**        |              |                     |                      |
|                     | Leaf area index      | 0.6135**        | 0.833**       | 0.3649              |                 |              |                     |                      |
|                     | Photosynthetic rate  | 0.606**         | 0.5742*       |                     |                 |              |                     |                      |
|                     | Root activity        | 0.7339**        |               |                     |                 |              |                     |                      |
|                     | Dry root weight      | 1               |               |                     |                 |              |                     |                      |
| R2                  | Grain yield          | 0.0731          | 0.5862**      | 0.7514**            | 0.8153**        | 0.2904       | 0.4153*             | 0.4986*              |
|                     | Specific leaf weight | 0.6166**        | 0.4542*       | 0.4278*             | 0.4206*         | 0.548*       | 0.5347**            |                      |
|                     | Chlorophyll content  | 0.3818          | 0.4389*       | 0.4268*             | 0.526**         | 0.471*       |                     |                      |
|                     | Leaf N yield         | 0.652**         | 0.8792**      | 0.5576**            | 0.594*          |              |                     |                      |
|                     | Leaf area index      | 0.2739          | 0.7513**      | 0.4164*             |                 |              |                     |                      |
|                     | Photosynthetic rate  | 0.5058*         | 0.5228**      |                     |                 |              |                     |                      |
|                     | Root activity        | 0.5368**        |               |                     |                 |              |                     |                      |
|                     | Dry root weight      | 1               |               |                     |                 |              |                     |                      |
| R4                  | Grain yield          | 0.2134          | 0.5953**      | 0.826**             | 0.6515**        | 0.2325       | 0.4447*             | 0.4965**             |
|                     | Specific leaf weight | 0.241           | 0.576**       | 0.7767**            | 0.4846*         | 0.2909       | 0.0504              |                      |
|                     | Chlorophyll content  | 0.0506          | 0.2475        | 0.2669              | 0.4624*         | 0.0215       |                     |                      |
|                     | Leaf N yield         | 0.1486          | 0.4134*       | 0.2908              | 0.1787          |              |                     |                      |
|                     | Leaf area index      | 0.1656          | 0.3159        | 0.5109*             |                 |              |                     |                      |
|                     | Photosynthetic rate  | 0.0124          | 0.4424*       |                     |                 |              |                     |                      |
|                     | Root activity        | 0.1871          |               |                     |                 |              |                     |                      |
|                     | Dry root weight      | 1               |               |                     |                 |              |                     |                      |

Data in the table are r-values

\* and \*\* represent correlation at 0.05 and 0.01, respectively.

<https://doi.org/10.1371/journal.pone.0174841.t012>

and 0.826\*\*, respectively. Nitrogen fertilizer applied at the time of seeding caused high photosynthetic rate, therefore increasing grain yield. An early published report of Brun et al. [55] confirmed the significant positive correlation with soybean grain yield. Dornhoff et al. [56] and Peet et al. [57] also found photosynthetic rate to be positively correlated with grain yield in soybean. Statistically significant relationship between root activity and photosynthetic rate was observed at the development stage in our study, indicating that increase of root activity can help to enhance the photosynthetic rate and thus grain yield.

There was significant and positive correlation between specific leaf weight and photosynthetic rate at V4, R2, and R4 stages, with a correlation coefficient of 0.7429\*\*, 0.4278\*, and 0.7767\*\*, respectively in our study. Our results corroborated the research conducted by Bhagsari et al. [58] and Hesketh et al. [59], who reported a positive relationship between specific

leaf weight and photosynthetic rate in soybean. Enhancing specific leaf weight may improve leaf photosynthesis and increase grain yield of soybean [49, 50]. Because there was significantly positive correlation between specific leaf weight and grain yield at V4, R2, and R4 stages (Table 12).

Our results demonstrated that there was positive correlation between leaf area index and grain yield at V4, R2, and R4 stages with a correlation coefficient of 0.3957, 0.8153\*, and 0.6515\*\*, respectively (Table 12). Leaf area index is an important parameter that influences grain yield of soybean [60–62]. Similarly, Sun et al. [52] reported that there was a significantly positive relationship between leaf area index and soybean grain yield at pod-filling stage and seed-filling stage. Sincik et al. [63] reported a significant relationship between grain yield and leaf area index.

## Conclusions

Environmental conditions during the growing season significantly affected soybean grain yield ( $P < 0.05$ ), with 2013 having higher grain yield. Starter nitrogen fertilizer significantly promoted grain yield in 2014. This significant response of grain yield to N supply in 2014 could be ascribed to a significant increase in root activity, photosynthetic rate, leaf area index, and specific leaf weight at the developmental stage (V4, R2, and R4) in our study. Applied nitrogen fertilizer at sowing significantly affected root activity, photosynthetic parameters at the early stage (V4, and R2), but significant response was not observed at R4 stage in 2013. That may be due to different precipitation at the late growing stage between two years. The grain yield increment due to  $N_{25}$ ,  $N_{50}$ , and  $N_{75}$  was  $40.39 \text{ kg ha}^{-1}$ ,  $77.93 \text{ kg ha}^{-1}$ , and  $49.87 \text{ kg ha}^{-1}$ , respectively in 2013, and  $18.71 \text{ kg ha}^{-1}$ ,  $83.27 \text{ kg ha}^{-1}$ , and  $61.96 \text{ kg ha}^{-1}$ , respectively in 2014 compared to no N treatment. The difference in grain yield obtained in our study could be adequate to offset additional fertilizer cost. Therefore, it is noted that applying starter nitrogen fertilizer at the time of planting is within the current production practices. Our results proved that, it is necessary to apply a certain amount of starter nitrogen fertilizer when planting in China.

## Acknowledgments

Special thanks to the members of Jiamusi Branch of Heilongjiang Academy of Agricultural Sciences. We thank Yubo Wang, Chunlei Zou, and Lei Liu for their encouragement. We are also grateful to an anonymous reviewer who provided useful comments and greatly contributed to improve this manuscript.

## Author Contributions

**Conceptualization:** ZJG.

**Data curation:** ZJG JTZ.

**Formal analysis:** ZJG CFL.

**Funding acquisition:** ZJG JTZ.

**Investigation:** ZJG JTZ.

**Methodology:** ZJG.

**Project administration:** ZJG JTZ.

**Resources:** ZJG JTZ.

**Software:** ZJG JTZ.

**Supervision:** ZJG.

**Visualization:** ZJG.

**Writing – original draft:** ZJG CFL.

**Writing – review & editing:** ZJG CFL.

## References

1. Ray JD, Heatherly LG, Fritschi FB. Influence of Large Amounts of Nitrogen on Nonirrigated and Irrigated Soybean. *Crop Sci.* 2005; 46: 52–60.
2. Sorensen RC, Purcell LC. Nitrogen fertilization of soybeans. *Agron J.* 1978; 70(2): 213–216.
3. Gai ZJ, Zhang W, Jiang FF, Cai LJ. Response of soybean root nodule and yield to biological-sugar nitrogen fertilizer and urea. *J Nuclear Agric Sci.* 2016; 30(4): 822–827.
4. Streeter JG. Inhibition of legume nodule formation and N<sub>2</sub> fixation by nitrate. *CRC Critical Review. Plant Sci.* 1988; 7: 1–23.
5. Harper JE. Soil and symbiotic nitrogen requirements for optimum soybean production. *Crop Sci.* 1974; 14 (2): 255–260.
6. Harper JE. Nitrogen metabolism. In: Wilcox JR. *Soybeans: Improvement, production and uses.* Madison: ASA-CSSA-SSSA; 1987. pp. 497–533.
7. Hatfield JL, Egli DB, Leggett JE, Peaslee DE. Effect of applied nitrogen on the nodulation and early growth of soybean. *Agron J.* 1974; 66(1): 112–114.
8. Hardy RWF, Burns RC, Herbert RR, Jackson EK. Biological nitrogen fixation: A key to world protein. *Plant Soil.* 1971; 35(35): 561–590.
9. Bergersen FJ. The bacterial component of soybean root nodules; changes in respiratory activity, cell dry weight and nucleic acid content with increasing nodule age. *J Gen Microbiol.* 1958; 19(2): 312–323. <https://doi.org/10.1099/00221287-19-2-312> PMID: 13587897
10. Touchton JT, Rickerl DH. Soybean growth and yield response to starter fertilizers. *Soil Sci Soc Am J.* 1986; 50(1): 234–237.
11. Beard HB, Hoover RM. Effect of nitrogen on nodulation and yield of irrigated soybean. *Agron J.* 1971; 63(5): 815–816.
12. Sij JW, Turner FT, Craigmiles JP. “Starter nitrogen” fertilization in soybean culture. *Commun Soil Sci Plan.* 1979; 10(11): 1451–1457.
13. Starling ME, Wood CW, Weaver DB. Starter Nitrogen and Growth Habit Effects on Late-Planted Soybean. *Agron J.* 1998; 90(5): 658–662.
14. Jeffery DR., Larry GH, Felix BF. Influence of large amount of nitrogen on nonirrigated and irrigated soybean. *Crop Sci.* 2006; 46(1): 52–60.
15. Boroomandan P, Khoramivafa M, Haghi Y, Ebrahimi A. The effects of nitrogen starter fertilizer and plant density on yield, yield components and oil and protein content of soybean. *Pak J Biol Sci.* 2009; 12(4): 378–382. PMID: 19579973
16. Pikul JL, Carpenter-bogs L, Vigil M. Crop yield and soil conditions under ridge and chisel-plow tillage in the northern Corn Belt, USA. *Soil Till Res.* 2001; 60(1): 21–33.
17. Fageria NK, Baligar VC, Clark RB. *Physiology of crop production.* New York: Food Products Press; 2006.
18. Liu LJ, Sun CS, Zu W. Effects of nitrogen on nodule-forming and nitrogen concentration in soybean leaves. *J Northeast Agric Univ.* 2005; 36 (2): 133–137.
19. Zhang X, Huang G, Bian X, Zhao Q. Effects of root interaction and nitrogen fertilization on the chlorophyll content, root activity, photosynthetic characteristics of intercropped soybean and microbial quantity in the rhizosphere. *Plant Soil Environ.* 2013; 59(2): 80–88.
20. Egli DB, Bruening W. Planting date and soybean yield: Evaluation of environmental effects with a crop stimulation model: SOYGRO. *Agric For Meteorol.* 1992; 62: 19–29.
21. Chen GH, Wiatrak P. Soybean development and yield are influenced by planting date and environmental conditions in the southeastern coastal plain, United States. *Agron J.* 2010; 102: 1731–1737.
22. Serraj R, Sinclair TR. Soybean cultivar variability for nodule formation and growth under drought. *Plant Soil.* 1998; 202(1): 159–166.

23. Adeli A, Sistani RK, Tewilde H. Effects of broiler litter on soybean production and soil nitrogen and phosphorus concentrations. *Agron J.* 2005; 97(1): 314–321.
24. Liu XB, Jin J, Wang GH, Herbert SJ. Soybean yield physiology and development of high-yielding practices in Northeast China. *Field Crops Res.* 2008; 105: 157–171.
25. Wan T. Effect of nitrogen levels on photosynthesis rate and yield of soybean. Thesis, Northeast Agric Univ. 2013.
26. Dong SK, Gong ZP, Zu W. Effects of nitrogen nutrition levels on N-accumulation and yields of soybean. *Plant Nutr Fert Sci.* 2010; 16 (1): 65–70.
27. Muchow RC, Sinclair TR. Water and nitrogen limitations in soybean grain production. II. Field and model analyses. *Field Crops Res.* 1986; 15: 143–156.
28. Tian HY. Effects of N fertilization at different stages on nitrogenase activity and yield of soybean. Thesis, Northeast Agric Univ. 2007.
29. Mathew JP, Herbert SJ, Zhang SH, Rautenkranz AAF, Litchfield GV. Differential response of soybean yield components to the timing of light enrichment. *Agron J.* 2000; 92: 1156–1161.
30. Purell DE, Switzer RE. Drought and nitrogen source effects on nitrogen nutrition, seed growth, and yield in soybean. *J Plant Nutr.* 1996; 19(6): 949–966.
31. Rotundo JL, Westgate ME. Meta-analysis of environmental effects on soybean seed composition. *Field Crops Res.* 2009; 110(2): 147–156.
32. Wang H, Jiang Y, Li YM, Wang SD, Liu W. Effects of different growth regulators treatments on plant morphology and yield of soybean. *Crops.* 2014; 3: 63–66.
33. Herbert SJ, Litchfield GV. Partitioning soybean seed yield components. *Crop Sci.* 1982; 22(5): 1074–1079.
34. Di W, Dong SK, Zhang L. Effects of nitrogen application on yield and nitrogen accumulation in soybean. *J Nuclear Agric Sci.* 2010; 24 (3): 612–617.
35. Jayapaul P, Ganesaraja V. Studies on response of soybean varieties to N and P. *Ind J Agron.* 1990; 35 (3): 329–330.
36. Taylor RS, Weaver DB, Wood CW. Nitrogen application increases yield and early dry matter accumulation in late-planted soybean. *Agron J.* 2005; 45: 854–858.
37. Mehmet OZ. Nitrogen rate and plant population effects on yield and yield components in soybean. *Afr J Biotechnol.* 2008; 7(24): 4464–4470.
38. Wang X, Xu Y, Li GJ, Li HN. Mapping quantitative trait loci for 100-seed weight in soybean. *Act Agron Sin.* 2010; 36 (10): 1674–1678.
39. Wang SQ, Han XZ. Root morphology and nitrogen accumulation in soybean (*Glycine max L.*) under different nitrogen application levels. *Chin J Eco-Agric.* 2009; 17(6): 1069–1073.
40. Zhang HB, Ren WJ, Yang WY, Wu XY, Wang Z, Yang JZ. Effects of different nitrogen levels on morphological and physiological characteristics of relay-planting soybean root. *Acta Agron Sin.* 2007; 33(1): 107–112.
41. Darrah PR. The rhizosphere and plant nutrition: A quantitative approach. *Plant Soil.* 1993; 155: 1–20.
42. Osborne SL, Riedell WE. Starter nitrogen fertilizer impact on soybean yield and quality in the Northern Great Plains. *Agron J.* 2006; 98(6): 1569–1574.
43. Shen XH, Jiang C, Zhang JT. Correlation between spectrum reflectance and chlorophyll content of soybean leaves under different nitrogen level. *Soybean Sci.* 2012; 31(1): 73–80.
44. Kramer PJ. Carbon dioxide concentration, photosynthesis and dry matter production. *BioSci.* 1981; 31 (1): 29–33.
45. Tucker CJ. Red and photographic infrared linear combinations for monitoring vegetation. *Remote Sens Environ.* 1979; 8: 127–150.
46. Zhang X, Huang G, Bian X, Zhao Q. Effects of root interaction and nitrogen fertilization on the chlorophyll content, root activity, photosynthetic characteristics of intercropped soybean and microbial quantity in the rhizosphere. *Plant Soil Environ.* 2013; 59(2): 80–88.
47. Anten NPR. Optimal photosynthetic characteristics of individual plants in vegetation stands and implications for species coexistence. *Ann Bot.* 2005; 95: 495–506. <https://doi.org/10.1093/aob/mci048> PMID: 15585543
48. Zhu GJ, Jiang GM, Hao NB. Relationship between eco-physiological features and grain yield in different soybean varieties. *Acta Bot Sin.* 2002; 44(6): 725–730.
49. Jeffrey A, Thompson LE, Randall LN. Association of specific leaf weight, an estimate of chlorophyll, and chlorophyll concentration with apparent photosynthesis in soybean. *Photosynthesis Res.* 1996; 49(49): 1–10.

50. Thompson JA, Nelson RL, Schweitzer LE. Relationships among specific leaf weight, photosynthetic rate, and seed yield in soybean. *Crop Sci.* 1995; 35(6): 1575–1581.
51. Board JE, Harville BG. Growth dynamics during the vegetative period affects yield of narrow-row, late-planted soybeans. *Agron J.* 1996; 88: 567–572.
52. Sun GH, Liu XL, Dong LJ. A study on relationship between leaf area index and yield in soybean. *Liaoning Agric Sci.* 2003; 4: 13–14.
53. Du WG, Zhang GR, Ge QX. Research on the photosynthetic activity of soybean leaf. *Soybean Sci.* 1988; 7(4): 337–340.
54. Zhang HS, Cheng YX, Wang DQ. Correlation analysis of chlorophyll content and yield at pod period of soybean. *Soybean Sci.* 2001; 20(4): 275–279.
55. Brun WA, Cooper RL. Effects of light intensity and carbon dioxide concentration on photosynthetic rate of soybean. *Crop Sci.* 1967; 7: 451–454.
56. Dornhoff GM, Shibles RM. Varietal differences in net photosynthesis of soybean leaves. *Crop Sci.* 1970; 10(1): 42–45.
57. Peet MM, Bravo A, Wallace DH, Ozbun JL. Photosynthesis, stomatal resistance, and enzyme activities in relation to yield of field-grown dry bean varieties. *Crop Sci.* 1977; 17(2): 287–293.
58. Bhagsari AS, Ashley DA, Brown RH, Boerma HR. Leaf photosynthetic characteristics of determinate soybean cultivars. *Crop Sci.* 1977; 17(7): 929–932.
59. Hesketh JM, Oregon WL, Hageman ME, Peters DB. Correlations among leaf carbon CO<sub>2</sub>-exchange rates, areas and enzyme activities among soybean cultivars. *Photosynthesis Res.* 1981; 2(1): 21–30.
60. Zhang MC, Sun WX, Liu YY. Timing of N application affects net primary production of soybean with different planting densities. *J Integr Agr.* 2014; 13(12): 2778–2787.
61. Setiyono TD, Weiss A, Specht JE, Cassman KG, Dobermann A. Leaf area index simulation in soybean grown under near-optimal conditions. *Field Crops Res.* 2008; 108(1): 82–92.
62. Seadh SE, Abido WAE. How soybean cultivars canopy affect yield and quality. *J Agron.* 2013; 12 (1): 46–52.
63. Sincik M, Goksoy AT, Turan ZM. Soybean seed yield performances under different cultural practices. *Turk J Agric For.* 2009; 33: 111–118.
